# Supplementary material
Source: PubMed Central journal article supplement (PMC5692529)
Supplement: pnas.1703431114.sapp.pdf [file pnas.1703431114.sapp.pdf]

## Supplemental Information

### Off-tumor targets compromise antiangiogenic drug sensitivity by inducing kidney erythropoietin production

Masaki Nakamura<sup>1</sup>, Yin Zhang<sup>1,2</sup>, Yunlong Yang<sup>1</sup>, Ceylan Sonmez<sup>1</sup>, Wenyi Zheng<sup>1</sup>, Guichun Huang<sup>1</sup>, Takahiro Seki<sup>1</sup>, Hideki Iwamoto<sup>1</sup>, Bo Ding<sup>3</sup>, Linlin Yin<sup>3</sup>, Theodoros Foukakis<sup>4</sup>, Thomas Hatschek<sup>4</sup>, Xuri Li<sup>5</sup>, Kayoko Hosaka<sup>1</sup>, Jiaping Li<sup>6\*</sup>, Guohua Yu<sup>7\*</sup>, Xincheng Wang<sup>2\*</sup>, Yizhi Liu<sup>5\*</sup> and Yihai Cao<sup>1,2,5\*</sup>

<sup>1</sup>Department of Microbiology, Tumor and Cell Biology, Karolinska Institute, 171 77 Stockholm, Sweden

<sup>2</sup>Central Research Laboratory, The Affiliated Hospital of Qingdao University, Qingdao, 266071, China

<sup>3</sup>Department of Hematology and Oncology, The Fourth Hospital of Jinan, Jinan, Shandong 250031, China

<sup>4</sup>Department of Oncology-Pathology, Karolinska Institutet, Karolinska University Hospital, 171 77 Stockholm, Sweden

<sup>5</sup>State Key Laboratory of Ophthalmology, Zhongshan Ophthalmic Center, Sun Yat-Sen University, Guangzhou 510060, China

<sup>6</sup>Department of Interventional Oncology, The First Affiliated Hospital; Zhongshan School of Medicine, Sun Yat-sen University, Guangzhou, 510080, P. R. China

<sup>7</sup>Wei Fang People's Hospital, Yu He Road 151, Kui Wen District, Weifang, Shandong, China

**Key words:** Tumor, angiogenesis, erythropoietin, hematopoiesis, drug resistance

\*Corresponding authors

Supplemental Table 1. Blood counts of RBC, HGB, and HCT<sup>1</sup>

| Group              |                          | RBC (1×10 <sup>12</sup> /L) | HGB(g/L)      | HCT(%)       |
|--------------------|--------------------------|-----------------------------|---------------|--------------|
| tumor-bearing mice | Non-treated healthy mice | 8.67 ± 0.17                 | 124.43 ± 2.95 | 37.74 ± 1.17 |
|                    | NIIgG <sup>2</sup>       | 6.44 ± 0.32                 | 104 ± 5.51    | 35.63 ± 1.84 |
|                    | Anti-VEGF                | 6.80 ± 0.30                 | 109 ± 6.11    | 37.37 ± 1.22 |
|                    | NIIgG + sEPoR            | 6.50 ± 0.17                 | 104 ± 3.02    | 35.10 ± 0.81 |
|                    | Anti-VEGF + sEPoR        | 6.68 ± 0.54                 | 106.50 ± 3.50 | 35.95 ± 2.95 |

<sup>1</sup> RBC = red blood cell; HGB = hemoglobin; HCT = hematocrit.

<sup>2</sup> NIIgG = non-immune IgG

**Supplementary table 2. Patients' clinical and demographic characteristics**

| Patient Number | Gender | Age | Diagnosis     | Stage           | Metastatic Site               | RBC <sup>1</sup><br>( $\times 10^{12}$ ) | Hb <sup>2</sup><br>(g/L) | HCT <sup>3</sup><br>(%) | Treatment            |
|----------------|--------|-----|---------------|-----------------|-------------------------------|------------------------------------------|--------------------------|-------------------------|----------------------|
| 1              | Male   | 51  | Rectal Cancer | IV              | Lung                          | 3.91                                     | 119                      | 36.0                    | FOLFOX <sup>4</sup>  |
| 2              | Male   | 40  | Rectal Cancer | IV              | Liver, adrenal gland, bone    | 4.39                                     | 116                      | 35.5                    | FOLFOX               |
| 3              | Male   | 64  | Colon Cancer  | IV              | Lung                          | 4.52                                     | 137                      | 41.3                    | FOLFOX               |
| 4              | Male   | 31  | Colon Cancer  | IIIA(pT2N1b M0) | -                             | 4.83                                     | 158                      | 44.5                    | FOLFOX               |
| 5              | Male   | 58  | Rectal Cancer | IIIB(pT3N2a M0) | -                             | 4.19                                     | 126                      | 37.8                    | FOLFOX               |
| 6              | Male   | 42  | Colon Cancer  | IV              | Liver                         | 4.98                                     | 116                      | 37.8                    | FOLFOX               |
| 7              | Male   | 54  | Colon Cancer  | IV              | Peritoneal wall               | 4.32                                     | 137                      | 39.9                    | FOLFOX               |
| 8              | Male   | 64  | Rectal Cancer | IV              | Liver                         | 4.98                                     | 145                      | 43.7                    | FOLFOX               |
| 9              | Male   | 54  | Colon Cancer  | IV              | Liver, mesenteric lymph nodes | 4.25                                     | 128                      | 37.4                    | FOLFOX               |
| 10             | Male   | 62  | Colon cancer  | IV              | Peritoneal wall               | 3.95                                     | 128                      | 38.7                    | XELOX <sup>5</sup>   |
| 11             | Female | 53  | Colon cancer  | IV              | Liver                         | 3.46                                     | 120                      | 35.4                    | XELOX                |
| 12             | Female | 44  | Colon cancer  | IV              | Peritoneal wall               | 3.85                                     | 120                      | 36                      | FOLFIRI <sup>6</sup> |
| 13             | Male   | 72  | Rectal cancer | IV              | Liver, lung                   | 4.46                                     | 147                      | 43                      | XELOX                |

|    |        |    |               |    |                               |      |     |       |         |
|----|--------|----|---------------|----|-------------------------------|------|-----|-------|---------|
| 14 | Male   | 65 | Rectal cancer | IV | Liver, lung                   | 4.52 | 129 | 37.7  | FOLFOX  |
| 15 | Male   | 49 | Colon cancer  | IV | Lung                          | 4.63 | 130 | 40.4  | FOLFOX  |
| 16 | Female | 47 | Colon cancer  | IV | Peritoneal wall               | 4.35 | 91  | 31    | FOLFOX  |
| 17 | Female | 80 | Rectal cancer | IV | Liver, mesenteric lymph nodes | 4.07 | 122 | 34.5  | FOLFOX  |
| 18 | Male   | 53 | Rectal cancer | IV | Peritoneal wall               | 3.42 | 99  | 30.3  | XELOX   |
| 19 | Male   | 57 | Colon cancer  | IV | Peritoneal wall               | 3.95 | 72  | 25.3  | FOLFIRI |
| 20 | Male   | 75 | Colon cancer  | IV | Liver, mesenteric lymph nodes | 4.11 | 129 | 38.1  | FOLFOX  |
| 21 | Male   | 46 | Rectal cancer | IV | Liver                         | 4.33 | 124 | 0.377 | FOLFOX  |
| 22 | Female | 75 | Rectal cancer | IV | Peritoneal wall               | 4.93 | 135 | 41.2  | FOLFOX  |
| 23 | Male   | 30 | Colon cancer  | IV | Liver                         | 4.68 | 145 | 41.9  | XELOX   |
| 24 | Female | 53 | Colon cancer  | IV | Peritoneal wall               | 3.83 | 132 | 39.1  | XELOX   |
| 25 | Male   | 35 | Colon cancer  | IV | Lung                          | 4.09 | 131 | 37.6  | FOLFOX  |
| 26 | Male   | 52 | Colon cancer  | IV | Peritoneal wall               | 3.42 | 113 | 34.9  | FOLFOX  |
| 27 | Male   | 61 | Rectal cancer | IV | Liver                         | 4.78 | 147 | 43.8  | FOLFOX  |

|    |        |    |               |    |                               |      |     |      |                     |
|----|--------|----|---------------|----|-------------------------------|------|-----|------|---------------------|
| 28 | Male   | 45 | Colon cancer  | IV | Peritoneal wall               | 4.52 | 124 | 37.9 | XELOX               |
| 29 | Male   | 33 | Colon cancer  | IV | Lung                          | 4.13 | 123 | 37.1 | FOLFIRI             |
| 30 | Female | 53 | Colon cancer  | IV | Liver, lung                   | 3.6  | 126 | 35.8 | XELOX               |
| 31 | Female | 53 | Colon cancer  | IV | Liver                         | 3.43 | 114 | 33.5 | XELOX               |
| 32 | Female | 53 | Colon cancer  | IV | Lung                          | 3.64 | 120 | 35.8 | XELOX               |
| 33 | Female | 53 | Colon cancer  | IV | Peritoneal wall               | 3.88 | 127 | 36.6 | XELOX               |
| 34 | Male   | 60 | Colon cancer  | IV | Peritoneal wall               | 3.90 | 128 | 38.5 | FOLFOX              |
| 35 | Male   | 47 | Colon cancer  | IV | Peritoneal wall               | 4.25 | 138 | 41.1 | Bevacizumab+FOLF OX |
| 36 | Male   | 61 | Colon cancer  | IV | Liver                         | 4.29 | 120 | 36.7 | Bevacizumab+FOLF OX |
| 37 | Male   | 57 | Colon cancer  | IV | Liver, mesenteric lymph nodes | 4.41 | 141 | 41.3 | Bevacizumab+FOLF OX |
| 38 | Female | 46 | Rectal cancer | IV | Liver                         | 4.67 | 124 | 38.2 | Bevacizumab+FOLF OX |
| 39 | Male   | 52 | Rectal cancer | IV | Lung                          | 4.77 | 148 | 43.6 | Bevacizumab+FOLF OX |
| 40 | Male   | 76 | Colon cancer  | IV | Liver, lung                   | 4.22 | 126 | 37.8 | Bevacizumab+FOLF OX |
| 41 | Female | 47 | Colon cancer  | IV | Liver                         | 3.78 | 128 | 35.8 | Bevacizumab+FOLF OX |

|    |        |    |               |    |                               |      |     |      |                      |
|----|--------|----|---------------|----|-------------------------------|------|-----|------|----------------------|
| 42 | Male   | 51 | Rectal cancer | IV | Lung                          | 4.16 | 124 | 37.8 | Bevacizumab+FOLF OX  |
| 43 | Male   | 68 | Colon cancer  | IV | Lung                          | 4.4  | 128 | 40.8 | Bevacizumab+FOLF OX  |
| 44 | Male   | 74 | rectal cancer | IV | Liver                         | 4.68 | 121 | 38   | Bevacizumab+FOLF IRI |
| 45 | Male   | 62 | rectal cancer | IV | Liver, mesenteric lymph nodes | 5.24 | 156 | 47.2 | Bevacizumab+FOLF IRI |
| 46 | Male   | 57 | Colon cancer  | IV | Liver, lung                   | 4.61 | 108 | 35.5 | Bevacizumab+XELO X   |
| 47 | Male   | 41 | Colon cancer  | IV | Peritoneal wall               | 4.57 | 138 | 41.6 | Bevacizumab+FOLF OX  |
| 48 | Male   | 67 | Colon cancer  | IV | Liver, Peritoneal wall        | 4.65 | 140 | 42.8 | Bevacizumab+FOLF OX  |
| 49 | Male   | 75 | Colon cancer  | IV | Liver                         | 4.29 | 141 | 41.5 | Bevacizumab+FOLF OX  |
| 50 | Female | 68 | Colon cancer  | IV | Liver                         | 3.75 | 125 | 36.9 | Bevacizumab+FOLF OX  |
| 51 | Male   | 67 | Colon cancer  | IV | Peritoneal wall               | 4.13 | 137 | 39.3 | Bevacizumab+ XELOX   |
| 52 | Female | 63 | Rectal cancer | IV | Liver                         | 3.75 | 121 | 36.8 | Bevacizumab+ XELOX   |
| 53 | Female | 53 | Rectal cancer | IV | Liver, peritoneal wall        | 3.65 | 117 | 33.4 | Bevacizumab+FOLF OX  |
| 54 | Male   | 47 | Colon cancer  | IV | Peritoneal wall               | 4.64 | 142 | 43.4 | Bevacizumab+FOLF OX  |
| 55 | Male   | 61 | Colon cancer  | IV | Liver                         | 4.69 | 129 | 39.7 | Bevacizumab+FOLF OX  |

|    |        |    |               |    |                               |      |     |      |                     |
|----|--------|----|---------------|----|-------------------------------|------|-----|------|---------------------|
| 56 | Male   | 57 | Colon cancer  | IV | Liver, mesenteric lymph nodes | 4.73 | 149 | 43.8 | Bevacizumab+FOLF OX |
| 57 | Female | 46 | Rectal cancer | IV | Liver                         | 4.73 | 121 | 38.5 | Bevacizumab+FOLF OX |
| 58 | Male   | 52 | Rectal cancer | IV | Lung                          | 4.74 | 146 | 42.7 | Bevacizumab+FOLF OX |
| 59 | Male   | 76 | Colon cancer  | IV | Liver, lung                   | 4.49 | 130 | 39.4 | Bevacizumab+FOLF OX |
| 60 | Female | 47 | Colon cancer  | IV | Liver                         | 4    | 132 | 38   | Bevacizumab+FOLF OX |
| 61 | Male   | 51 | Rectal cancer | IV | Lung                          | 4.07 | 123 | 37   | Bevacizumab+FOLF OX |
| 62 | Male   | 47 | Colon cancer  | IV | Peritoneal wall               | 4.34 | 131 | 40.1 | Bevacizumab+FOLF OX |
| 63 | Male   | 61 | Colon cancer  | IV | Liver                         | 4.62 | 125 | 38.4 | Bevacizumab+FOLF OX |
| 64 | Male   | 57 | Colon cancer  | IV | Liver, mesenteric lymph nodes | 4.46 | 144 | 41.7 | Bevacizumab+FOLF OX |
| 65 | Female | 46 | Rectal cancer | IV | Liver                         | 4.9  | 118 | 38.4 | Bevacizumab+FOLF OX |
| 66 | Male   | 52 | Rectal cancer | IV | Lung                          | 4.9  | 148 | 44.2 | Bevacizumab+FOLF OX |

<sup>1</sup> RBC = red blood cell

<sup>2</sup> Hb = hemoglobin

<sup>3</sup> HCT = hematocrit

<sup>4</sup> FOLFOX = folinic acid, fluorouracil, and oxaliplatin

<sup>5</sup>XELOX = capecitabine and oxaliplatin

<sup>6</sup>FOLFIRI = folinic acid, fluorouracil, and irinotecan



**Supplemental Table 3. Baseline characteristics and outcome of the 61 patients of the PROMIX trial included in the analysis**

| Characteristic                                            | Value     |
|-----------------------------------------------------------|-----------|
| Age - years                                               |           |
| Median                                                    | 49.7      |
| Range                                                     | 33.2-69.2 |
| Menopausal status - no.                                   |           |
| Premenopausal                                             | 40        |
| Postmenopausal $\leq 5$ years                             | 7         |
| Postmenopausal $> 5$ years                                | 14        |
| Baseline tumor size - mm                                  |           |
| Median                                                    | 60        |
| Range                                                     | 20-180    |
| Baseline axillary nodal status                            |           |
| Negative                                                  | 17        |
| Positive (verified)                                       | 36        |
| Unknown / uncertain                                       | 8         |
| Baseline hormone receptor status - no.                    |           |
| ER and/or PgR positive                                    | 42        |
| ER-and PgR-negative                                       | 19        |
| Baseline cell proliferation value (Ki67 % positive cells) |           |
| $\leq 20\%$                                               | 20        |
| $> 20\%$                                                  | 36        |
| Missing                                                   | 5         |
| Pathological complete response (pCR) at surgery           |           |
| Yes                                                       | 10        |
| No                                                        | 51        |
| Disease status*                                           |           |
| Free of relapse                                           | 42        |
| Relapse or death                                          | 19        |
| Vital status*                                             |           |
| Alive                                                     | 47        |
| Deceased                                                  | 14        |

\*after a median follow up of 63.6 months

1  
2

## Supplemental Figures

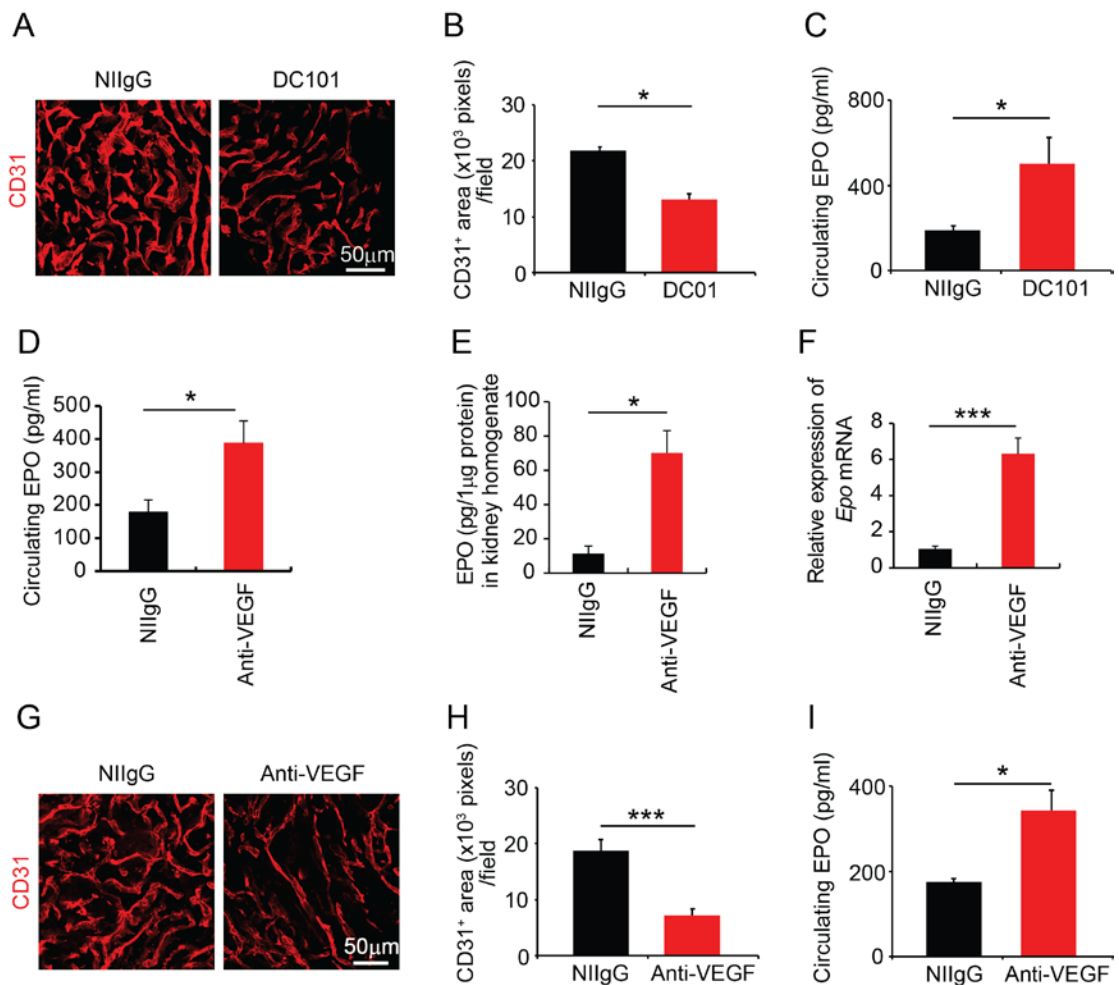

3

### Supplemental Figure 1. Anti-VEGF induces kidney EPO production in tumor-free animals

4 (A) Kidney cortex CD31<sup>+</sup> microvessels in tumor free mice treated with NIIgG and  
5 DC101.

6 (B) Quantification for CD31<sup>+</sup> microvessels in tumor free mice kidney cortex (n = 6  
7 samples per group). \**p* < 0.05.

8 (C) ELISA analysis of plasma EPO protein levels NIIgG- and DC101-treated  
9 tumor-free animals (n = 6 samples per group). \**p* < 0.05.

10  
11

- 1 (D) ELISA analysis of plasma EPO protein levels of NIIgG- and anti-VEGF-treated  
2 tumor-free animals (n = 6 samples per group). \* $p < 0.05$ .
- 3 (E-F) ELISA analysis of EPO protein levels and qPCR analysis of *Epo* mRNA levels  
4 of the NIIgG- and anti-VEGF-treated kidney cortex (n = 6 samples per group).  
5 \* $p < 0.05$ ; \*\*\* $p < 0.001$ . Data are means  $\pm$  s.e.m.
- 6 (G) Kidney cortex CD31<sup>+</sup> microvessels in 12-month old tumor free mice treated  
7 with NIIgG and anti-VEGF.
- 8 (H) Quantification for CD31<sup>+</sup> microvessels in old mice kidney cortex (n = 6 samples  
9 per group). \*\*\* $p < 0.001$ .
- 10 (I) ELISA analysis of plasma EPO protein levels of NIIgG- and anti-VEGF-treated  
11 old mice (n = 6 samples per group). \* $p < 0.05$ .

12  
13  
14  
15  
16  
17  
18  
19

A

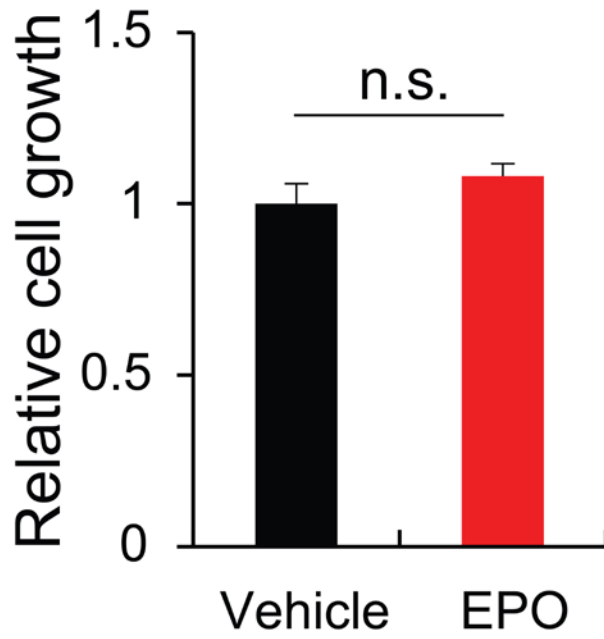

1

2 **Supplemental Figure 2. EPO effect on LLC tumor cell proliferation**

3 (A) Proliferation of vehicle- and rhEPO-treated LLC tumor cells was analyzed using  
4 a MTT assay (n = 6 samples per group). n.s. = not significant. Data are means  
5 ± s.e.m.

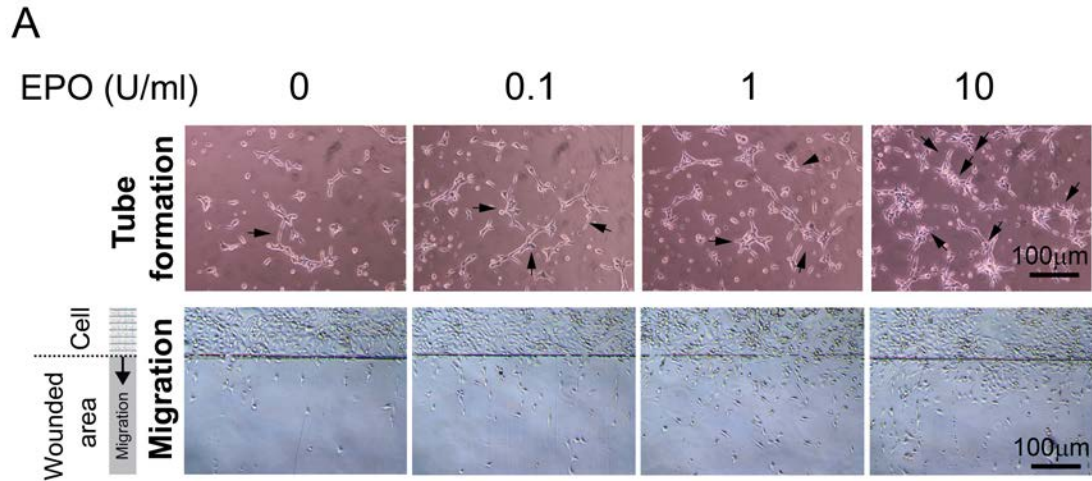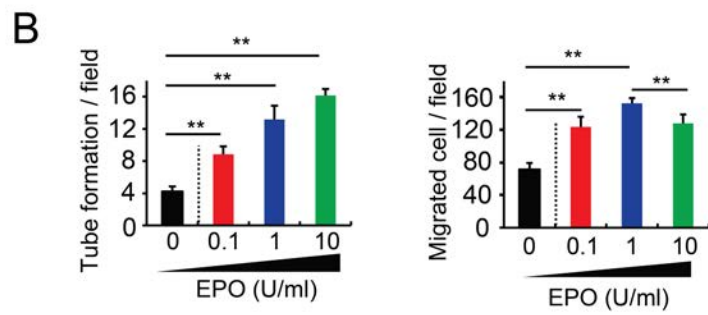

2 **Supplemental Figure 3. EPO-EpoR-triggered endothelial cell signaling and**  
 3 **functions**

4 (A&B) Representative images of endothelial cell tube formation and migrating cells in  
 5 the presence or absence of various concentrations of EPO protein.

6 Quantifications of endothelial cell tube formation and migration (n = 8 random  
 7 fields per group; quadruplicate per group). Scale bars = 100 μm. \*\**p* < 0.01.

8 Data are means ± s.e.m.

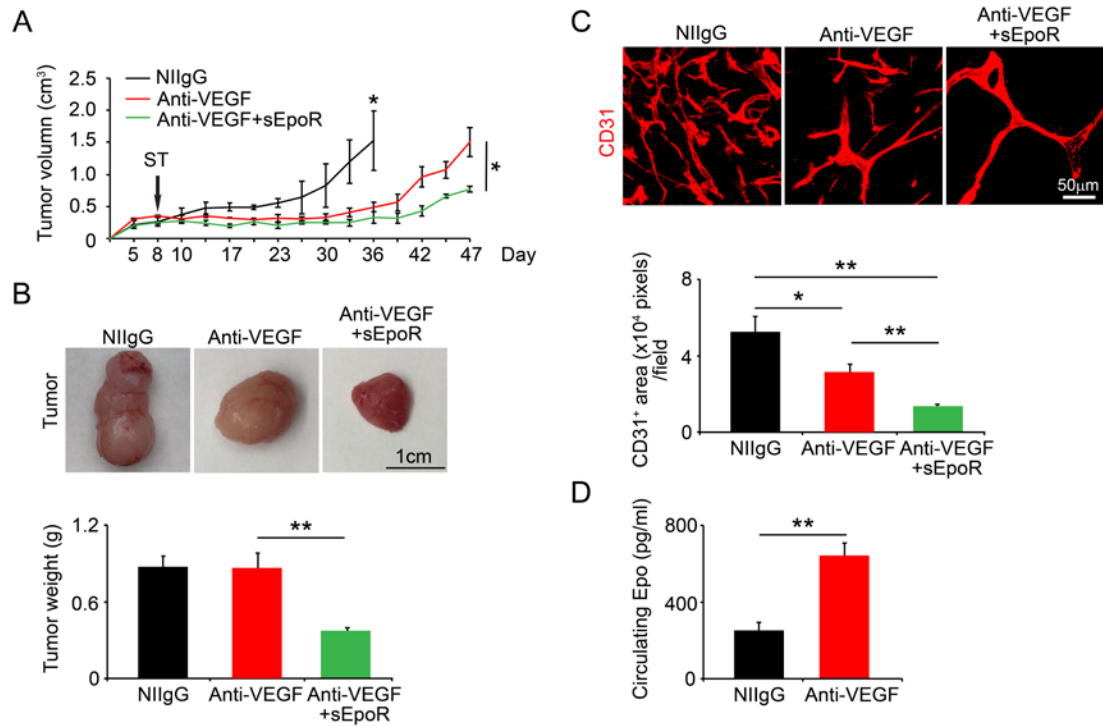

1

2 **Supplemental Figure 4. Enhanced antitumor and antiangiogenic effects of anti-**  
 3 **VEGF plus soluble Epo combination therapy in a human glioma model**

4 (A) Tumor growth rates (n = 4 animals per group).

5 (B) Tumor mass and Tumor weight (n = 4 animals per group).

6 (C) Immunohistochemical analyses of CD31<sup>+</sup> microvessels vessels. Scale bar =  
 7 50 μm. Quantifications of CD31<sup>+</sup> vessel density and dextran blood perfusion  
 8 (n = 6 samples per group).

9 (D) Circulating Epo levels after NIIgG and Anti-VEGF treatment (n = 3 animals  
 10 per group).

11 \**p* < 0.05; \*\**p* < 0.01. Data are means ± s.e.m.

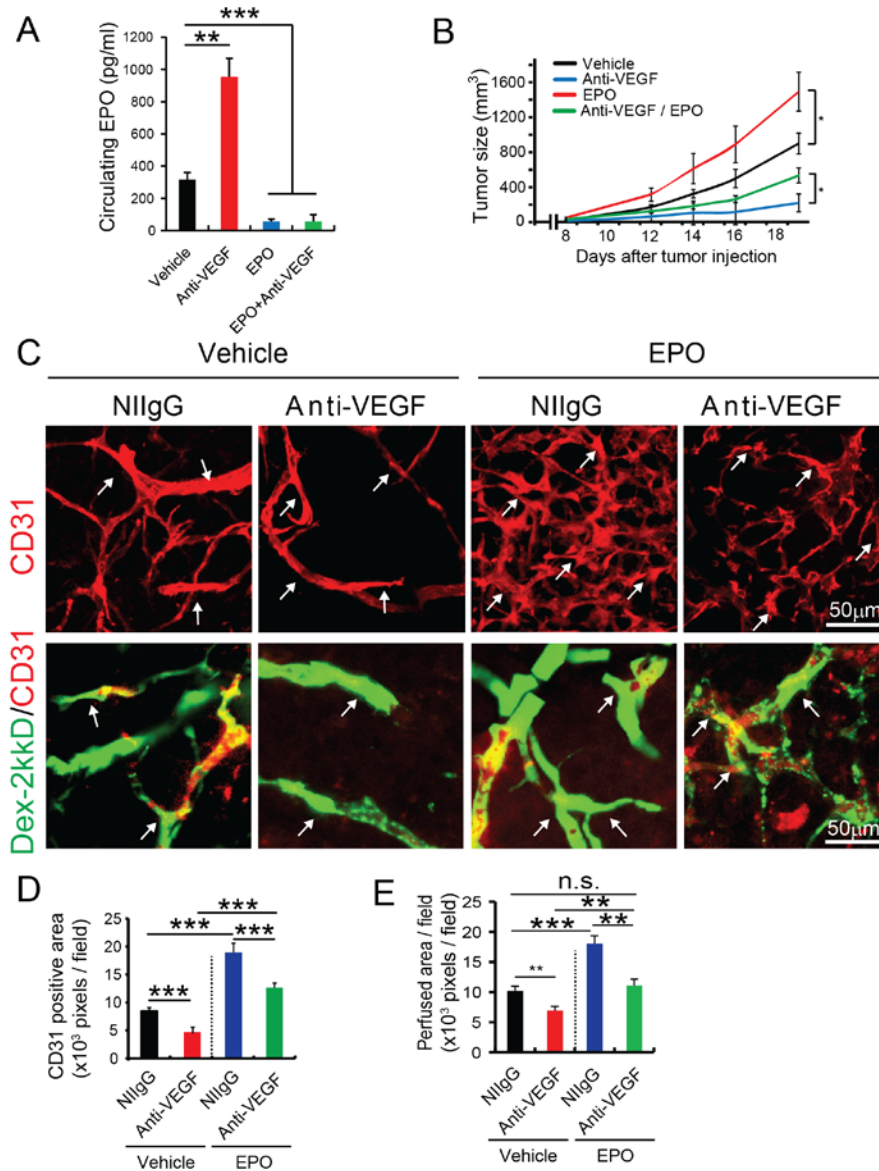

1

2 **Supplemental Figure 5. Extragenous EPO induces anti-VEGF resistance in a**  
 3 **fibrosarcoma model**

4 (A) Quantitative measurement of circulating EPO protein by ELISA (n = 4-5  
 5 samples per group).

6 (B) Tumor growth rates of NIIgG-, anti-VEGF-, rhEPO-, and anti-VEGF plus  
 7 rhEPO combination-treated T241 tumor-bearing mice (n = 6 animals per group).

8 \**p* < 0.05. n.s. = not significant.

9 (C) Immunohistochemical analyses of CD31<sup>+</sup> microvessels and vascular perfusion  
 10 of 2000 kD dextran of NIIgG-, anti-VEGF-, rhEPO-, and anti-VEGF plus

1 rhEPO combination-treated T241 tumors. Arrows in upper panels of **B** point to  
 2 CD31<sup>+</sup> blood vessels and in lower panels indicate perfused dextran<sup>+</sup> signals.  
 3 Scale bar = 50  $\mu$ m.

4 (D & E) Quantifications of CD31<sup>+</sup> vessel density and dextran blood perfusion (n = 10  
 5 samples per group). \*\**p* < 0.01; \*\*\**p* < 0.001. n.s. = not significant. Data are  
 6 means  $\pm$  s.e.m.

7

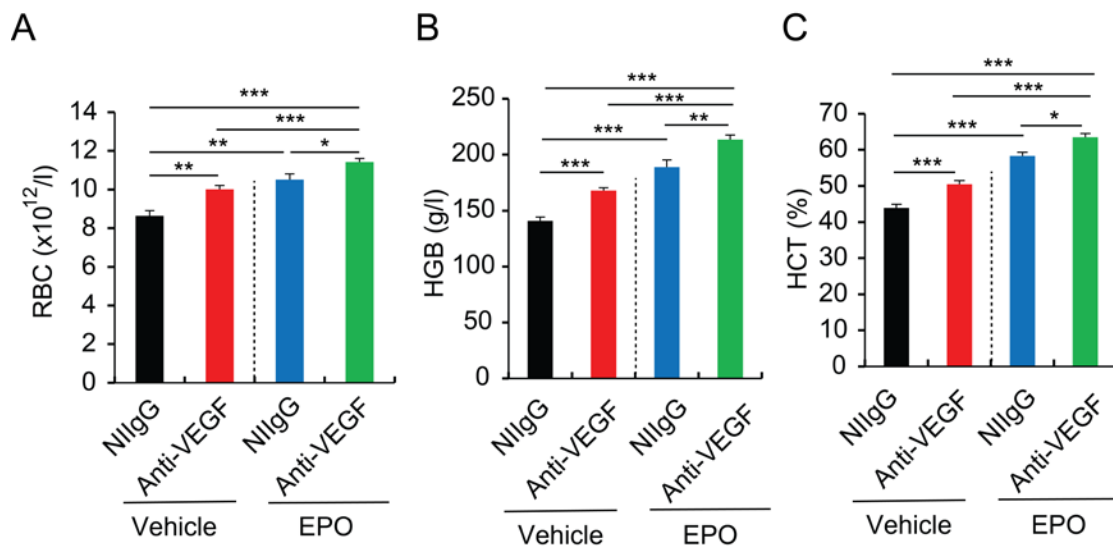

8

9 **Supplemental Figure 6. Exogenous EPO effect on hematocrit in T241 tumor-**  
 10 **bearing mice**

11 (A-C) Analyses of red blood cells, haemoglobin levels, and haematocrits of NilgG-,  
 12 anti-VEGF-, rhEPO-, and anti-VEGF plus rhEPO combination-treated T241  
 13 tumor-bearing mice (n = 6 animals per group). \**p* < 0.05; \*\**p* < 0.01; \*\*\**p* <  
 14 0.001. Data are means  $\pm$  s.e.m.



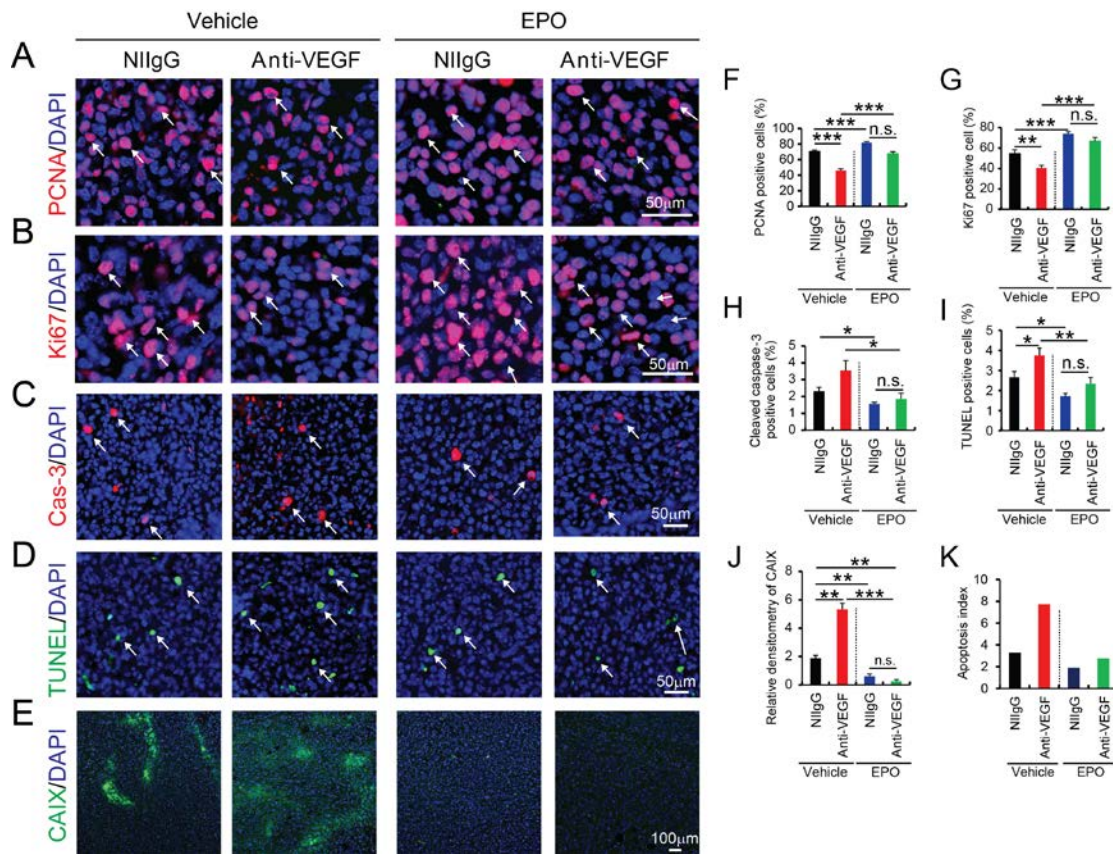

1

2 **Supplemental Figure 7. EPO inhibits anti-VEGF-induced tumor cell proliferation,**  
 3 **apoptosis, and hypoxia in a fibrosarcoma model**

4 (A-E) Immunohistochemical analyses of PCNA<sup>+</sup> proliferating tumor cells, Ki67<sup>+</sup>  
 5 proliferating tumor cells, cleaved caspase-3<sup>+</sup> apoptotic tumor cells, TUNEL<sup>+</sup>  
 6 apoptotic tumor cells, and tumor hypoxia of NilgG-, anti-VEGF-, rhEPO-, and  
 7 anti-VEGF plus rhEPO combination-treated T241 tumors. Arrows in the first  
 8 row panels indicate PCNA<sup>+</sup> proliferating tumor cells, in the second row panels  
 9 indicate Ki67<sup>+</sup> proliferating tumor cells, in the third row panels indicate cleaved  
 10 caspase-3<sup>+</sup> apoptotic tumor cells, and in the fourth row panels indicate TUNEL<sup>+</sup>  
 11 apoptotic tumor cells. Scale bar = 50 μm. CAIX positive hypoxic signals are  
 12 indicated with green signals in the fifth row panels. Scale bar = 100 μm. DAPI  
 13 in blue was used for counter-staining of cell nuclei.

1 (F-K) Quantification of PCNA<sup>+</sup> proliferating tumor cells, Ki67<sup>+</sup> proliferating tumor  
 2 cells, cleaved caspase-3<sup>+</sup> apoptotic tumor cells, TUNEL<sup>+</sup> apoptotic tumor cells,  
 3 CAIX positive hypoxic signals, and apoptosis index (n = 10 random fields per  
 4 group; 6 animals per group). \**p* < 0.05; \*\**p* < 0.01; \*\*\**p* < 0.001; n.s. = not  
 5 significant. Data are means ± s.e.m.

6

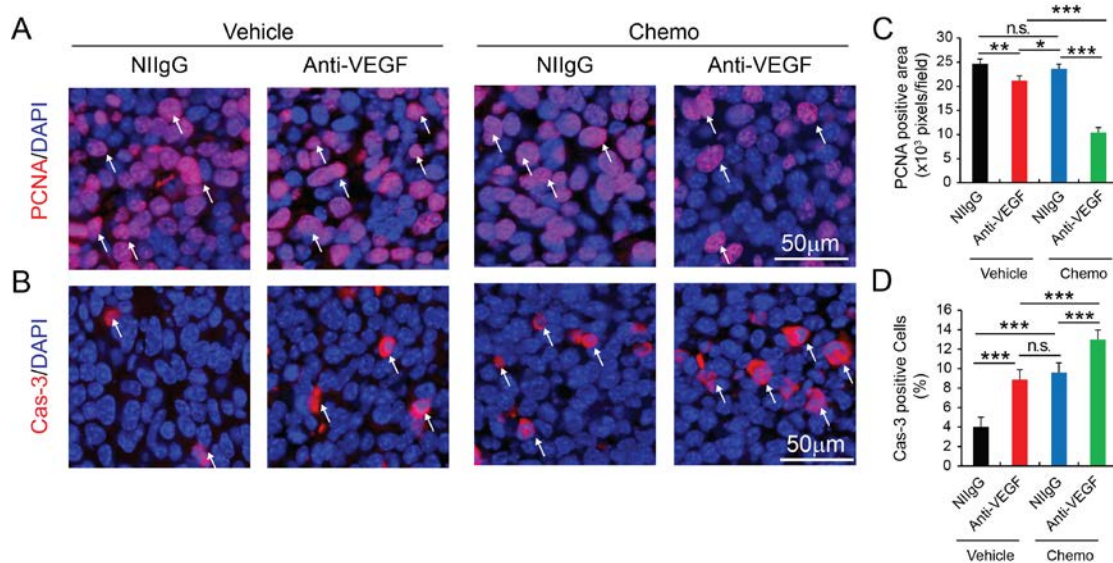

7

8 **Supplemental Figure 8. Chemotherapy in combination of anti-VEGF therapy**  
 9 **suppressed proliferation and induced apoptosis of tumor cells.**

10 (A & B) Immunohistochemical analyses of PCNA<sup>+</sup> proliferating tumor cells, and  
 11 cleaved caspase-3<sup>+</sup> apoptotic tumor cells of various monotherapy and  
 12 combination therapy-treated LLC tumors. Arrows in the upper row panels  
 13 indicate PCNA<sup>+</sup> proliferating tumor cells, and in the lower row panels indicate  
 14 cleaved caspase-3<sup>+</sup> apoptotic tumor cells. Scale bar = 50 μm.

15 (C & D) Quantification of PCNA<sup>+</sup> proliferating tumor cells, and cleaved caspase-3<sup>+</sup>  
 16 apoptotic tumor cells (n = 10 random fields per group; 6 animals per group). \**p*  
 17 < 0.05; \*\**p* < 0.01; \*\*\**p* < 0.001; n.s. = not significant. Data are means ± s.e.m

18

1

2

3

## Supplemental Materials and Methods

### 4 **Animals**

5 Male 6- to 8-week-old C57Bl/6 mice were bred, acclimated and caged in groups of ten  
6 or fewer mice in the animal facility at the Department of Microbiology, Tumor and Cell  
7 Biology, Karolinska Institutet. Mice were anesthetized by injection of a 1:1:2 mixture  
8 of hypnorm (Veta-Pharma), dormicum (Roche) and distilled water before all surgical  
9 procedures and killed by a lethal dose of CO<sub>2</sub>, which was followed by cervical  
10 dislocation. EpoR(-/-)::HG1-EpoR mice in C57Bl/6 background were purchased from  
11 the Experimental Animal Division, RIKEN BioResource Center (Tsukuba, Japan).  
12 *Epor* cDNA was fused to a genomic fragment containing Gata1-Hrd and the transgene  
13 constructs were injected into fertilized eggs derived from BDF1 parents and 6  
14 independent lines of transgenic mice were obtained. Two lines of mice were crossed  
15 with EpoR<sup>+/-</sup> mice to create the mutant mice EpoR<sup>+/-</sup>::HG1-EpoR as previously  
16 described (1). All mouse studies were approved by the Animal Ethics Committee of  
17 Northern Stockholm.

18

### 19 **Cell culture**

20 Lewis Lung Carcinoma (LLC) , U87 and T241 fibrosarcoma cell lines (2, 3) were cultured  
21 in DMEM (HyClone; cat. no. SH30243.01) supplemented with 10% heat-inactivated  
22 FBS (HyClone; cat. no. SH30160.03), 100 U/ml penicillin, and 100 µg/ml streptomycin  
23 (HyClone; cat. no. SV30010). The UT-7/EPO cell line was kindly provided by Dr.  
24 Norio Komatsu at the Juntendo University, Tokyo, Japan. Cells were cultured in 10%

1 FBS-IMDM (GE healthcare; cat. no. SH30228.01) containing 1 U/ml recombinant  
2 human erythropoietin (rhEPO; Shenyang Sunshine Pharmaceutical; cat. no. S2001001).

3

#### 4 **Generation of sEpoR-Fc fusion protein**

5 A cDNA fragment corresponding to the mouse soluble Epo receptor (4) was kindly  
6 provided by Dr. Masaya Nagao at the Kyoto University, Japan. This cDNA was  
7 modified and amplified by PCR using a pair of primers: forward primer: 5'-  
8 gggtcgacgcaccttcacccagcctcc-3'; and reverse primer: 5'-gggtcgacgggagtttgctgtgtttg-  
9 3'. This modified fragment was subsequently cloned into a pME18S expression vector  
10 that was kindly provided by Dr. Hisashi Arase at the Osaka University, Japan. pME18S-  
11 IgG Fc vector or pME18S mouse sEpoR-IgG Fc plasmid DNA were transiently  
12 transfected into 293T cells in DMEM supplemented with ultra-low IgG FBS (Thermo  
13 Fisher Scientific; cat. no. 16250086) for 2 days. Transfected cell supernatants were  
14 collected and Ig fusion proteins were purified using a protein A-sepharose affinity  
15 column (GE healthcare Life Sciences; cat. no. 17-5280-01).

16

#### 17 **Immunohistochemistry**

18 Cryostat tissue sections in 8  $\mu$ m thickness and PFA-fixed paraffin embedded tissue  
19 samples were incubated with specific antibodies against Ki67, PCNA, rabbit anti-  
20 mouse cleaved caspase-3 (Asp175) antibody (Cell Signaling; catalog no. 9661), CAIX,  
21 EpoR (proteintech, 55308-1-AP), or EPO, using our previously described  
22 immunohistochemical procedures (5, 6). An Alexa-555-conjugated goat anti-rat  
23 antibody (Life Technologies); an Alexa-555-conjugated goat anti-rabbit antibody (Life  
24 Technologies); an Alexa-488-conjugated donkey anti-rabbit antibody (Life  
25 Technologies), and a Cy5-conjugated goat anti-rat antibody (ChemiCon) were used as

1 secondary antibodies. For DAB staining, a horse raddish peroxidase (HRP) conjugated  
2 anti-rabbit antibody diluted with TBS in a ratio of 1:200 was used as a secondary  
3 antibody. After washing, slides were incubated with DAB (3,3'-diaminobenzidine  
4 tetrahydrochloride) (Sigma) and immediately washed under tap water after color  
5 development. Slides were counter-stained with hematoxylin. Stained slides were  
6 mounted with Pertex (Histolab; cat. no. 00801) and were observed under a light  
7 microscope.

8

### 9 **Whole-mount staining**

10 Tumor tissue whole-mount staining was performed as described previously (7). In brief,  
11 fresh tumor tissues were fixed at 4 °C overnight with 4% PFA, followed by washing  
12 with PBS. Tissues were cut into small and thin pieces by a scalpel, digested for 5 min  
13 with proteinase K in a 20 mM Tris buffer (pH 7.5), permeabilized with 100% methanol  
14 for 30 min, blocked in 3% milk in a 0.3% Triton X-100-PBS (Sigma-Aldrich; cat. no.  
15 X100) buffer, and incubated with anti-mouse CD31 (1:200; BD-Pharmingen,  
16 553370) at 4 °C overnight. The primary antibody-stained tumor tissues were blocked  
17 further with 3% milk, followed by incubation for 2 h with Alexa Fluor 555-labelled  
18 goat anti-rat (1:400; Invitrogen, A21434) secondary antibody at room temperature.  
19 Tissues were washed at 4 °C overnight thoroughly with PBS before mounting in  
20 Vectashield mounting medium (Vector Laboratories; cat. no. H-1000), and were  
21 subsequently stored at -20 °C until further analysis. Consecutive scanning of seven  
22 layers of each tissue sample was assembled to constitute a 3D-image dataset using a  
23 software program (Nikon, EZ-C1) analysis. Each dataset was quantified from at least  
24 10 different random fields of using an Adobe Photoshop CS software program.

1

## 2 **FACS analysis**

3 The single cell suspension was prepared by a 0.40 µm-filter. Cells were stained for  
4 45 min on ice with a rabbit anti-mouse EpoR antibody (1:100; proteintech, 55308-1-  
5 AP). After rigorous washing with PBS, cells were incubated with an Alexa Fluor 555-  
6 labelled goat anti-rabbit antibody for 20 min on ice. Expression of EpoR were analysed  
7 using an FACS analyser (MoFlo XTD, Beckman Coulter).

8

## 9 **Blood sample analysis**

10 Fresh animal blood was intracardially collected and plasma was prepared using the  
11 anticoagulant EDTA, followed by centrifugation. Hematological parameters including  
12 hemoglobin, hematocrit, red blood cell count were determined by an automated  
13 hematology analyzer (Mindray).

14

## 15 **ELISA**

16 Fifty milligrams of fresh kidney or tumor tissue were homogenized in a 500 µl lysis  
17 buffer (Cat. No. C3228, Sigma) containing a cocktail of proteinase inhibitors (Cat. No.  
18 P8340, Sigma) using an electronic homogenizer. Tissue homogenates were centrifuged  
19 at 12000 rpm for 15 min and 50 µl of supernatant from each sample were analysed using  
20 an ELISA kit detecting mouse EPO (Cat. No. MEP00B, R&D Systems Inc.) according  
21 to the manufacturer's instruction. Blood samples from mice or human were collected  
22 using EDTA and centrifuged at 2000g for 20min. Plasma samples were collected and  
23 50 µl of samples were analysed using an ELISA kit detecting human EPO (Cat. No.  
24 ab119522, Abcam).

1

## 2 **Blood Perfusion**

3 Briefly, 1 mg of 2000-kD-lysinated LRD (D7139; Invitrogen) lysinated LRD (D1818;  
4 Invitrogen) in 100 ml ddH<sub>2</sub>O was intravenously injected into the tail vein of each  
5 mouse. At 5-min post-injection, mice were sacrificed by cervical dislocation and tumors  
6 were removed. Tumor tissues were fixed overnight with 4% PFA, followed by whole-  
7 mount immunostaining. A rat anti-mouse CD31 (1:200; AP183S; Invitrogen,) and a  
8 Cy5-labelled goat anti-rat IgG secondary antibody (1:200; AP183S; Invitrogen,) were  
9 used for vessel staining. Positive signals were detected by confocal Microscopy (Nikon  
10 C1 Confocal microscope; Nikon Corporation, Japan)

11

## 12 **TUNEL staining**

13 Apoptotic cells in tumor tissues were detected using an in situ cell-death detection kit  
14 (Roche; catalog no. 11684795910) according to the manufacturer's protocol. After  
15 staining, the mounted samples were examined with a fluorescent microscope, and at  
16 least 10 random areas were measured for each group using a Photoshop software  
17 program (Adobe).

18

## 19 **In vitro endothelial cell tube formation assay and migration assay**

20 Primary mouse endothelial cells were isolated from tumor-free C57Bl/6 mice and used  
21 for in vitro assay as described previously (8). Uptake of acetylated-LDL (Biomedical  
22 Tec.) was validated in these cells. Cells were cultured in 10 % FBS-DMEM and less  
23 than 10 passages were used throughout our experiments. For the capillary-like tube  
24 formation assay,  $1.5 \times 10^4$  cells were incubated in growth factor-reduced Matrigel (BD

1 Biosciences) in DMEM medium containing 0, 0.1, 1, and 10 U ml<sup>-1</sup> of rhEPO in 24-  
2 well plates for 8 h (quadruplicate per group). Images were photographed by light  
3 microscopy (Nikon). Vessel-like tube area and length of capillary tubes were  
4 quantitatively analyzed using Adobe Photoshop or NIH-element D1 (Nikon) programs.  
5 For migration assay, monolayer endothelial cells were seeded at 90% confluency 24-  
6 well plates. Monolayer cells were detached with a sterile blade and cultured in medium  
7 containing 0, 0.1, 1, and 10 U ml<sup>-1</sup> of rhEPO. After 48 h, migrated cells in the scratched  
8 area were photographed by light microscopy and counted using a NIH–element D1  
9 software program (n = 5-6 samples per group).

10

### 11 **Detection of hypoxia**

12 The hypoxia probe pimonidazole hydrochloride (Hypoxyprobe; cat. no. HP2-1000 kit)  
13 was i.p. injected at a dose of 60 mg kg<sup>-1</sup>. Tissue sections were subjected to  
14 immunofluorescent staining for CD31 and pimonidazole after rehydration. Antigen  
15 retrieval was done with a retrieval buffer (Cat. No. H3300, Vector laboratories) by  
16 boiling for 10 min. Sections were blocked with 4% goat serum for 30 min, followed by  
17 incubation at 4 °C overnight with an anti-CD31 primary antibody (Cat. No. AF3628,  
18 R&D; 1:200 dilution) or an anti-pimonidazole (Cat. No. HP2-1000Kit, Hypoxyprobe;  
19 1:200 dilution). Sections were further stained with a secondary donkey anti-goat Alexa  
20 555 antibody (Cat. No. A21432, Invitrogen). Images were captured under fluorescent  
21 microscopy (ECLIPSE 90i, NIS-Element D, Nikon).

22

### 23 **Proliferation assay**

24 LLC and T241 tumor cells (1 x 10<sup>4</sup>) were seeded onto each well of a 96-well plate. Cell  
25 proliferation (n = 6 samples per group) was analyzed at 48 h using a MTT (5 mg/mL;



1 M5655; Sigma-Aldrich) method. Densitometry absorbance at 490 nm was measured by  
2 a spectrophotometer.

3

#### 4 **RT-PCR and qPCR**

5 Total tissue RNAs were extracted using a 2-mercaptoethanol-supplemented (Sigma-  
6 Aldrich; cat. no. 3148) lysis buffer supplied in a RNA extraction kit (Thermo Scientific;  
7 catalog no. K0732). Absolute ethanol was added to tissue lysates before purification  
8 thorough a column according to the manufacturer's protocol. Total amount of RNA was  
9 measured and 1 µg RNA was used for cDNA synthesis by reverse transcription  
10 (Thermo Scientific; cat. no. K1632). qPCR was performed with a Power SYBR Green  
11 master mix (Life Technologies; cat. no. 4367659) reaction in a Step-One Plus machine  
12 according to the manufacturer's instructions (Applied Biosystems). Following primers  
13 were used to detect specific mRNA expression: *mEpo*-sense 5'-  
14 agaatggaggtggaagaacagg-3'; *mEpo*-anti-sense 5'-ctggtggctgggaggaatt-3'; *mHif1a*-sense  
15 5'-gtcggacagcctcacaaacag-3'; *mHif1a*-anti-sense 5'-taggtagtgagccaccagtgtcc-3';  
16 *mHif2a*-sense 5'-aatgacagctgacaaggagaaaa-3'; *mHif2a* anti-sense 5'-  
17 gagtgaagtcaaagatgctgtgtc-3'; *mEpor*-sense 5'-ggacacctacttggtattgg-3'; *mEpor*-anti-  
18 sense 5'-gacgtttaggctggagt-3';, and *mActin*-sense 5'-aggcccagagcaagagagg-3';  
19 *mActin*-anti-sense 5'-tacatggcggggtgtttaa-3'.

20

21

22

#### **Supplemental References**

- 1 1. Suzuki N, *et al.* (2002) Erythroid-specific expression of the erythropoietin  
2 receptor rescued its null mutant mice from lethality. *Blood* 100(7):2279-2288.
- 3 2. Cao R, *et al.* (2004) PDGF-BB induces intratumoral lymphangiogenesis and  
4 promotes lymphatic metastasis. *Cancer cell* 6(4):333-345.
- 5 3. Eriksson A, *et al.* (2002) Placenta growth factor-1 antagonizes VEGF-induced  
6 angiogenesis and tumor growth by the formation of functionally inactive PlGF-  
7 1/VEGF heterodimers. *Cancer cell* 1(1):99-108.
- 8 4. Nagao M, Masuda S, Abe S, Ueda M, & Sasaki R (1992) Production and ligand-  
9 binding characteristics of the soluble form of murine erythropoietin receptor.  
10 *Biochemical and biophysical research communications* 188(2):888-897.
- 11 5. Ji H, *et al.* (2014) TNFR1 mediates TNF-alpha-induced tumour  
12 lymphangiogenesis and metastasis by modulating VEGF-C-VEGFR3  
13 signalling. *Nature communications* 5:4944.
- 14 6. Hosaka K, *et al.* (2013) Tumour PDGF-BB expression levels determine dual  
15 effects of anti-PDGF drugs on vascular remodelling and metastasis. *Nature*  
16 *communications* 4:2129.
- 17 7. Dong M, *et al.* (2013) Cold exposure promotes atherosclerotic plaque growth  
18 and instability via UCP1-dependent lipolysis. *Cell metabolism* 18(1):118-129.
- 19 8. Xue Y, *et al.* (2012) PDGF-BB modulates hematopoiesis and tumor  
20 angiogenesis by inducing erythropoietin production in stromal cells. *Nature*  
21 *medicine* 18(1):100-110.

22

23

24
